# Supplementary material
Source: PubMed Central journal article supplement (PMC8384089)
Supplement: NIHMS1703287-supplement-1.pdf [file NIHMS1703287-supplement-1.pdf]

**Supplementary Table. Mean Intake by Sex.**

| Replicate | Sex | Group | n     | Day 1        | Day 2        | Day 3        | Day 4        | Day 5        | Day 6        | Day 7        |
|-----------|-----|-------|-------|--------------|--------------|--------------|--------------|--------------|--------------|--------------|
| HAP2      | F   | EtOH  | 16    | 23.80 ± 2.14 | 22.49 ± 1.42 | 21.11 ± 5.11 | 22.16 ± 1.07 | 24.25 ± 2.02 | 24.62 ± 2.43 | 24.97 ± 1.97 |
| HAP2      | M   | EtOH  | 15-16 | 20.53 ± 2.37 | 21.37 ± 3.93 | 13.85 ± 2.15 | 20.26 ± 1.46 | 21.9 ± 1.29  | 20.31 ± 1.60 | 22.16 ± 1.76 |
| HAP3      | F   | EtOH  | 6     | 25.37 ± 1.82 | 29.04 ± 3.39 | 27.15 ± 2.24 | 23.38 ± 5.06 | 19.79 ± 6.24 | 21.93 ± 5.05 | 21.97 ± 3.23 |
| HAP3      | M   | EtOH  | 24    | 25.85 ± 2.03 | 18.09 ± 1.21 | 18.81 ± 1.28 | 19.94 ± 1.69 | 18.21 ± 1.44 | 18.91 ± 1.77 | 20.44 ± .91  |
| HAP2      | F   | Water | 15-16 | 48.78 ± 3.91 | 53.42 ± 4.10 | 59.86 ± 3.84 | 57.72 ± 4.54 | 61.63 ± 4.88 | 64.41 ± 4.36 | 61.93 ± 4.43 |
| HAP2      | M   | Water | 14-16 | 37.20 ± 6.53 | 43.04 ± 6.42 | 50.48 ± 5.94 | 56.66 ± 5.28 | 63.25 ± 3.77 | 62.99 ± 4.38 | 68.72 ± 4.97 |
| HAP3      | F   | Water | 8     | 58.77 ± 7.51 | 62.46 ± 5.43 | 61.83 ± 6.38 | 62.28 ± 5.69 | 61.21 ± 3.91 | 64.43 ± 4.71 | 68.24 ± 5.57 |
| HAP3      | M   | Water | 23    | 59.17 ± 4.15 | 55.67 ± 3.37 | 55.58 ± 3.31 | 57.97 ± 2.81 | 55.75 ± 2.58 | 57.44 ± 2.60 | 59.93 ± 2.73 |

| Replicate | Sex | Group | n     | Day 8        | Day 9        | Day 10       | Day 11       | Day 12       | Day 13       | Day 14       |
|-----------|-----|-------|-------|--------------|--------------|--------------|--------------|--------------|--------------|--------------|
| HAP2      | F   | EtOH  | 16    | 23.45 ± 1.73 | 26.33 ± 1.92 | 27.20 ± 3.43 | 24.42 ± 2.14 | 25.30 ± 2.02 | 26.15 ± 1.17 | 26.01 ± 1.91 |
| HAP2      | M   | EtOH  | 15-16 | 16.01 ± 1.52 | 22.14 ± 1.74 | 21.22 ± 1.72 | 20.27 ± .73  | 20.33 ± 1.79 | 20.47 ± 1.35 | 20.9 ± 1.17  |
| HAP3      | F   | EtOH  | 6     | 21.1 ± 4.21  | 26.21 ± 5.16 | 25.58 ± 4.39 | 22.59 ± 4.05 | 26.66 ± 5.30 | 26.85 ± 5.34 | 24.57 ± 5.01 |
| HAP3      | M   | EtOH  | 24    | 18.88 ± 1.34 | 21.97 ± 1.08 | 21.79 ± 1.28 | 20.3 ± 1.07  | 22.18 ± 1.19 | 20.93 ± 1.13 | 23.29 ± 1.13 |
| HAP2      | F   | Water | 15-16 | 59.20 ± 4.99 | 62.56 ± 4.19 | 58.19 ± 4.17 | 59.54 ± 4.74 | 61.12 ± 4.56 | 62.08 ± 4.66 | 62.28 ± 3.84 |
| HAP2      | M   | Water | 14-16 | 57.3 ± 6.95  | 64.37 ± 4.48 | 65.54 ± 4.12 | 62.72 ± 4.40 | 58.56 ± 3.65 | 63.63 ± 4.16 | 60.04 ± 4.17 |
| HAP3      | F   | Water | 8     | 59.38 ± 5.21 | 57.59 ± 6.31 | 58.38 ± 5.97 | 52.62 ± 4.54 | 55.81 ± 6.18 | 55.72 ± 5.46 | 59.86 ± 6.13 |
| HAP3      | M   | Water | 23    | 51.94 ± 3.06 | 51.29 ± 2.82 | 52.96 ± 3.07 | 52.95 ± 3.08 | 54.21 ± 3.36 | 53.54 ± 2.35 | 54.5 ± 2.90  |

Supplementary Table. Total (2-hour) intakes by replicate, fluid group, and sex. Data are provided as mean ± SEM.
